# Supplementary material for: Evaluation of the Combined Effect of Artemisinin and Ferroptosis Inducer RSL3 against Toxoplasma gondii
Source: MDPI journal article supplement (doi:10.3390/ijms24010229), 2022-12-23
Supplement: s1 [file s1]

**Supplementary materials:**

**Table S1. The sequence of qPCR primers used in this study.**

| Gene Name | Gene number  | Forward Primer (5'-3')   | Reverse Primer (5'-3')  |
|-----------|--------------|--------------------------|-------------------------|
| Prx-2     | TGARI_266130 | AATCTCACAGGGCACTTTGGGAAG | CTCTACTAGGCGAAGCGGGTTTG |
| SOD       | TGARI_316310 | CAATGTCTGGTGGTGGTGGAGAAC | ATGCCCAACCTGAGCCAAAGTG  |
| Catalase  | TGARI_232250 | CAGGGATTGAACCGAGCGAAGATC | GCCAAGTCTGTGCCGATGAGTG  |

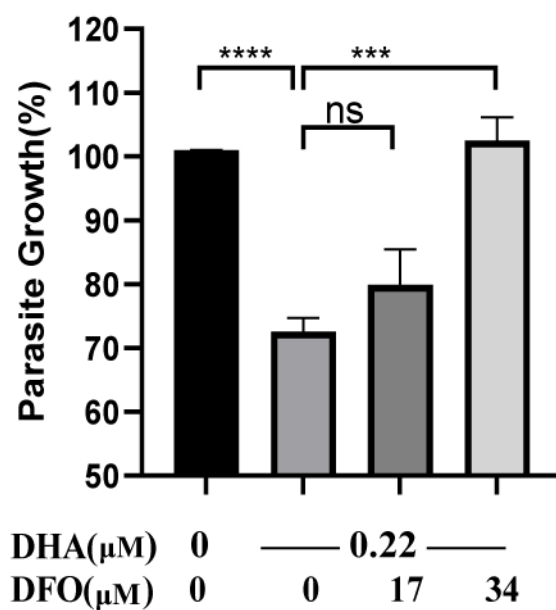

**Figure S1. Ferroptosis inhibitor DFO sresces the anti-parasitic effect of DHA.** Tachyzoites were pretreated of with 0.22  $\mu$ M DHA for 2h, then DHA was removed and 0 - 34  $\mu$ M DFO was added. Subsequently, the fluorescence value of TgRH Luc was measured after 22h of exposure. Statistical analysis used Student's t test (\*,  $P < 0.05$ , \*\*\*,  $P < 0.001$ , \*\*\*\*, and  $P < 0.0001$ ). Experiments were performed in triplicate.

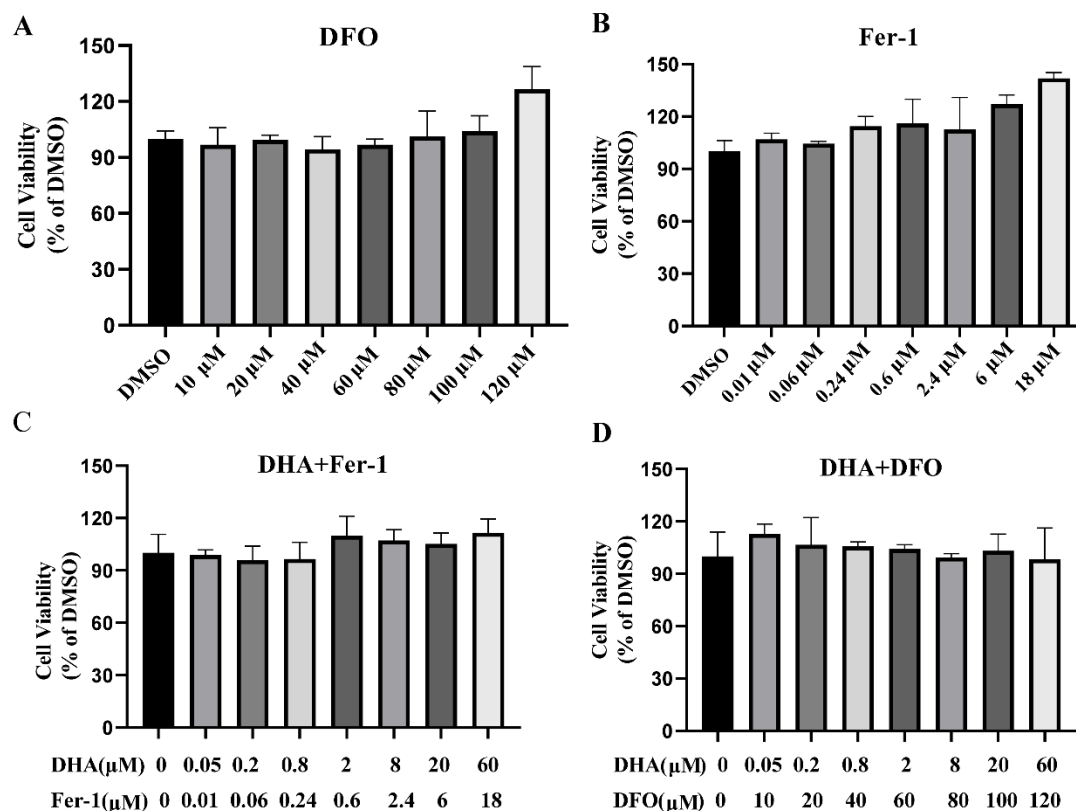

**Figure S2. Cytotoxicity of DFO and Fer-1 on Vero cells.** Cytotoxicity of 10-120  $\mu$ M DFO (A), 0.01-18  $\mu$ M Fer-1(B), 0.01-18  $\mu$ M Fer-1 supplemented with 0.05-60  $\mu$ M DHA (C), and 10-120  $\mu$ M DFO supplemented with 0.05-60  $\mu$ M DHA (D) on Vero cells was measured using CCK-8 reagent respectively. DMSO was set as a control. Cell Viability rate = OD RSL3/OD DMSO. This experiment was performed in triplicate.
